# Supplementary material for: Comparative Analysis of Fruit Ripening-Related miRNAs and Their Targets in Blueberry Using Small RNA and Degradome Sequencing
Source: MDPI journal article supplement (doi:10.3390/ijms18122767), 2017-12-19

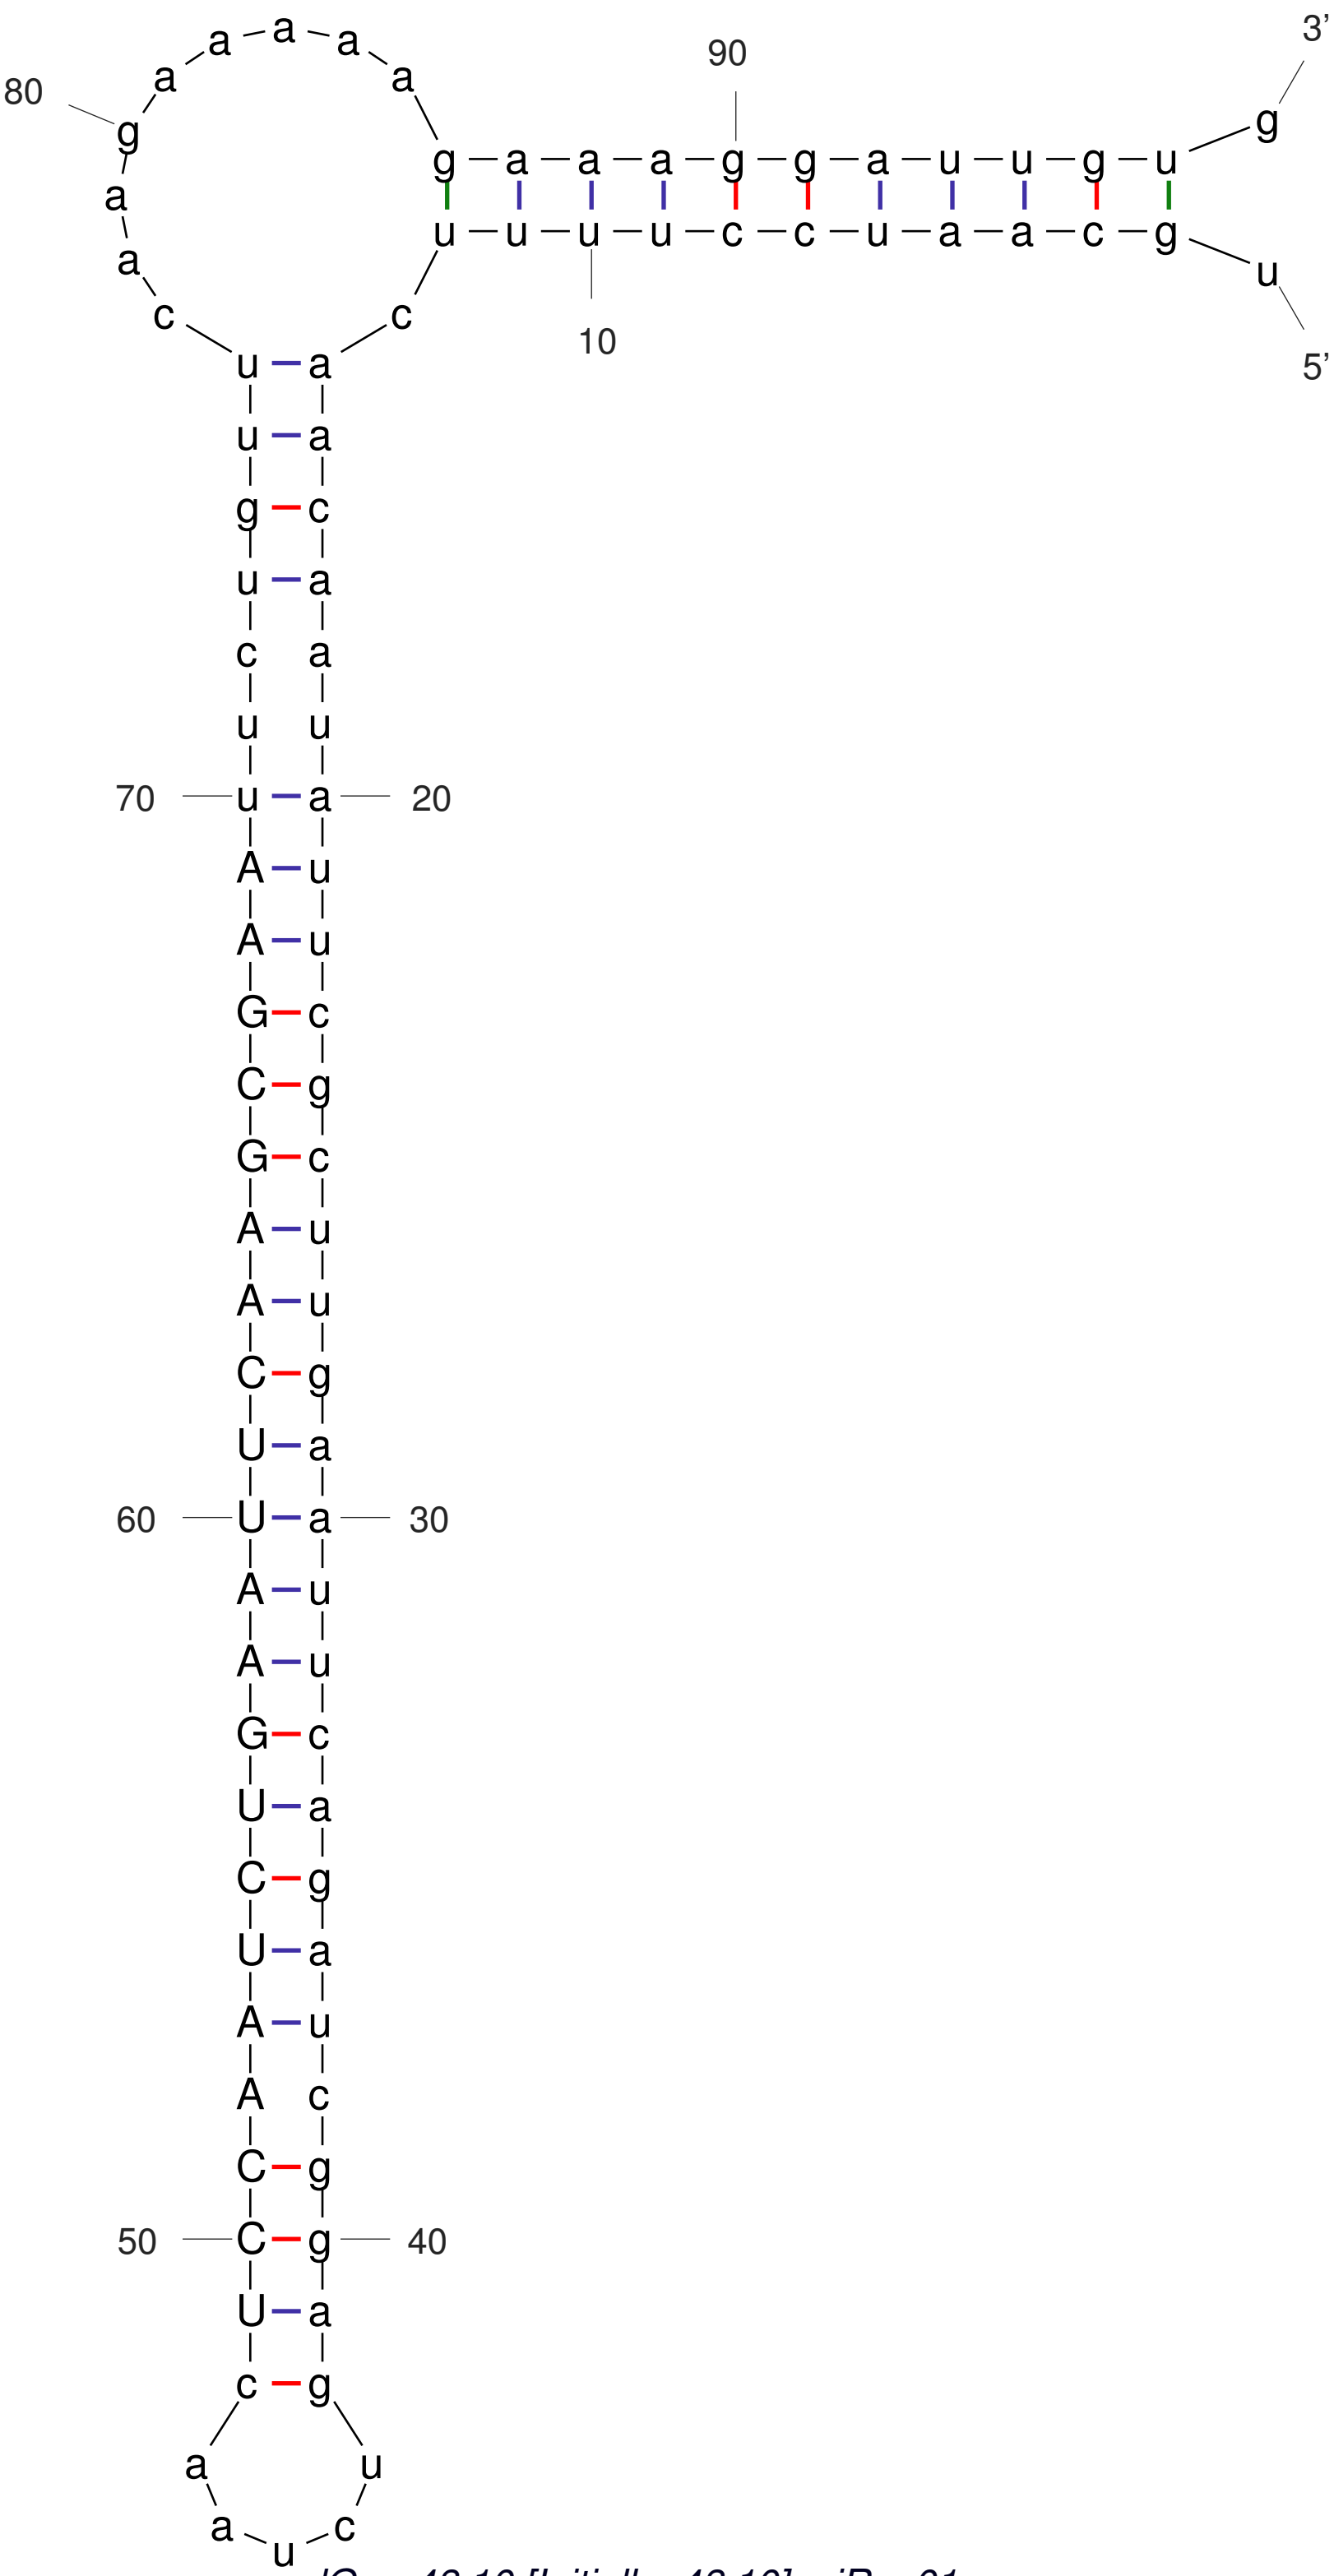

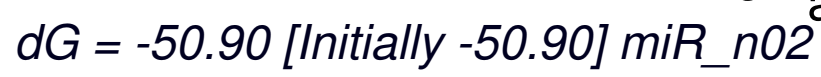

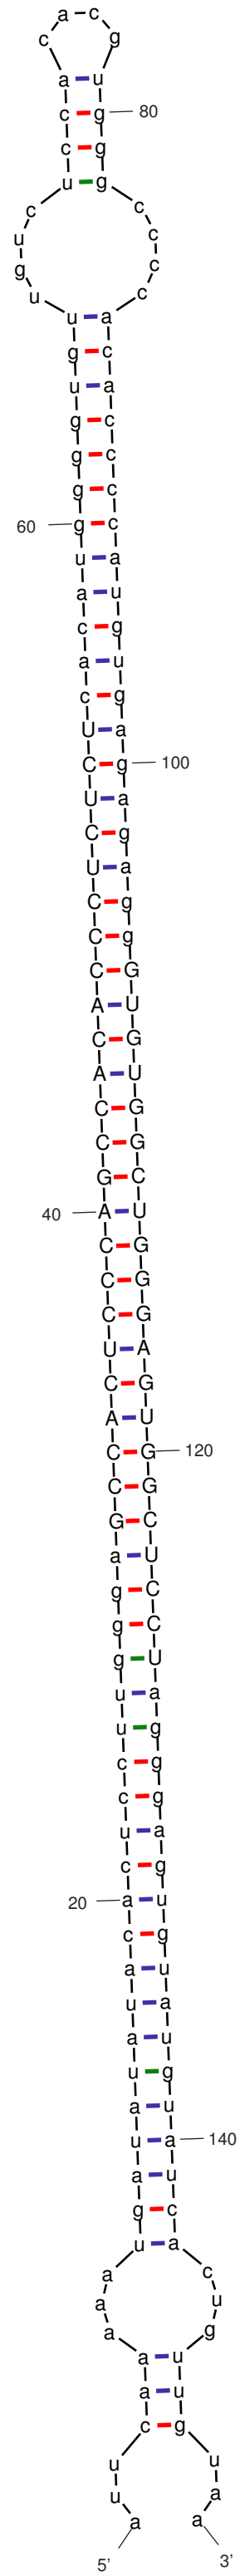

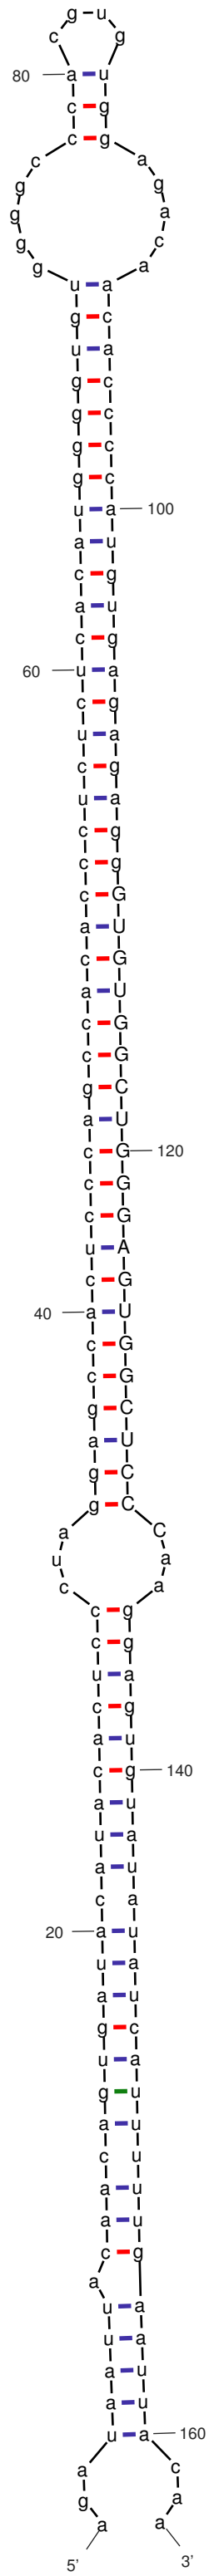

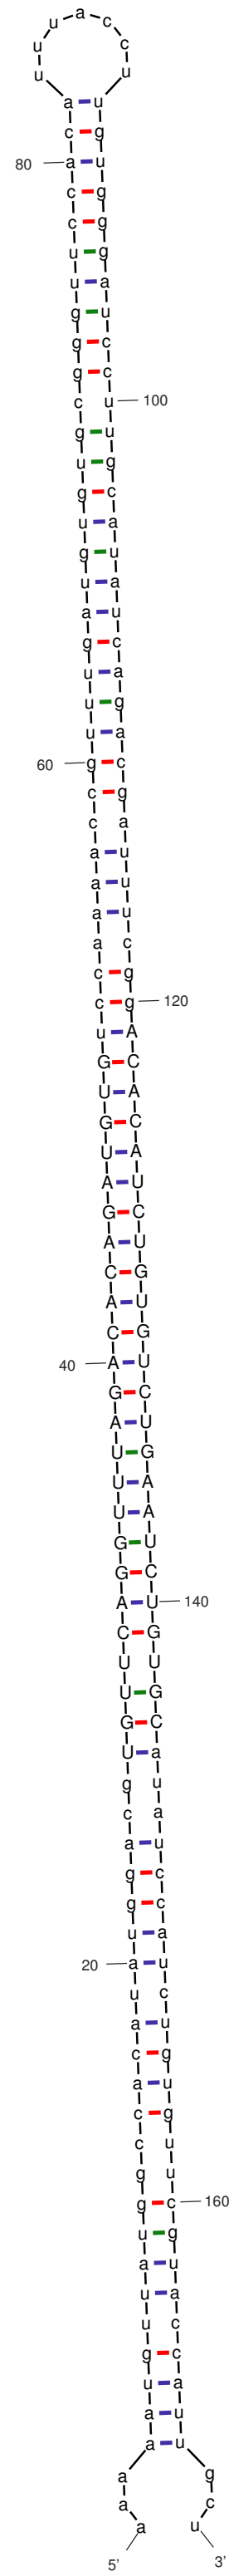

*dG = -100.60 [Initially -100.60] miR\_n05*

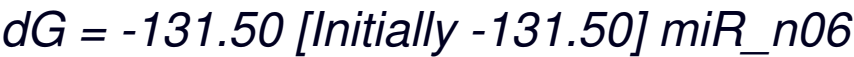

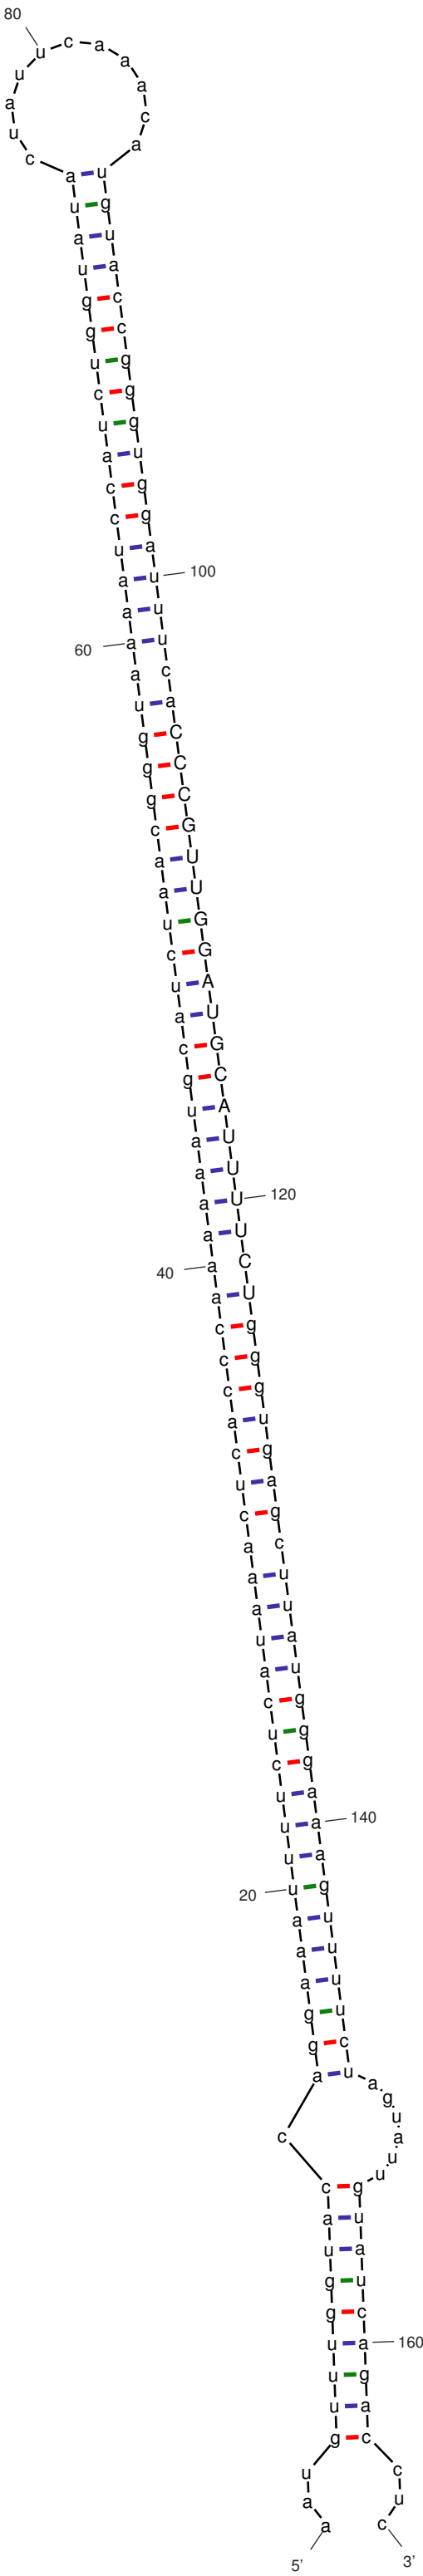

*dG = -95.00 [Initially -95.00] miR\_n07*

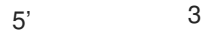

$dG = -74.50$  [Initially -77.00] miR\_n08-5p



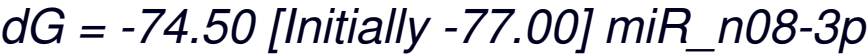

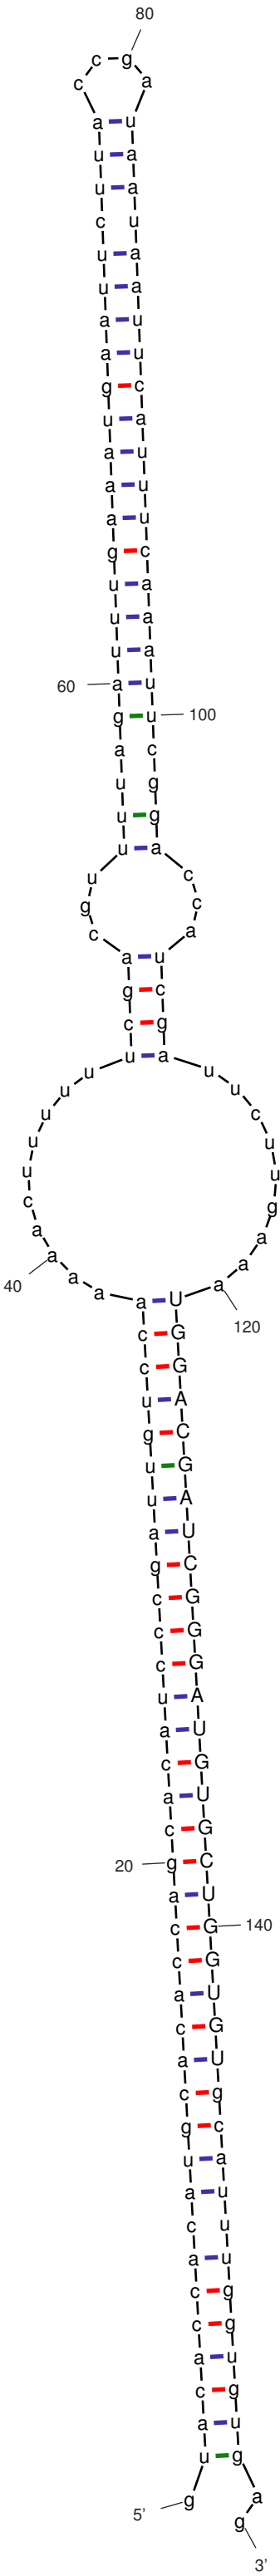

*dG = -88.10 [Initially -88.10] miR\_n09*

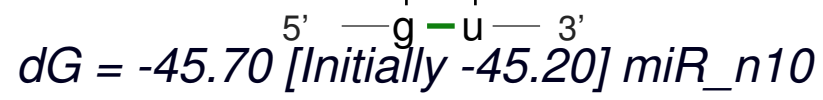

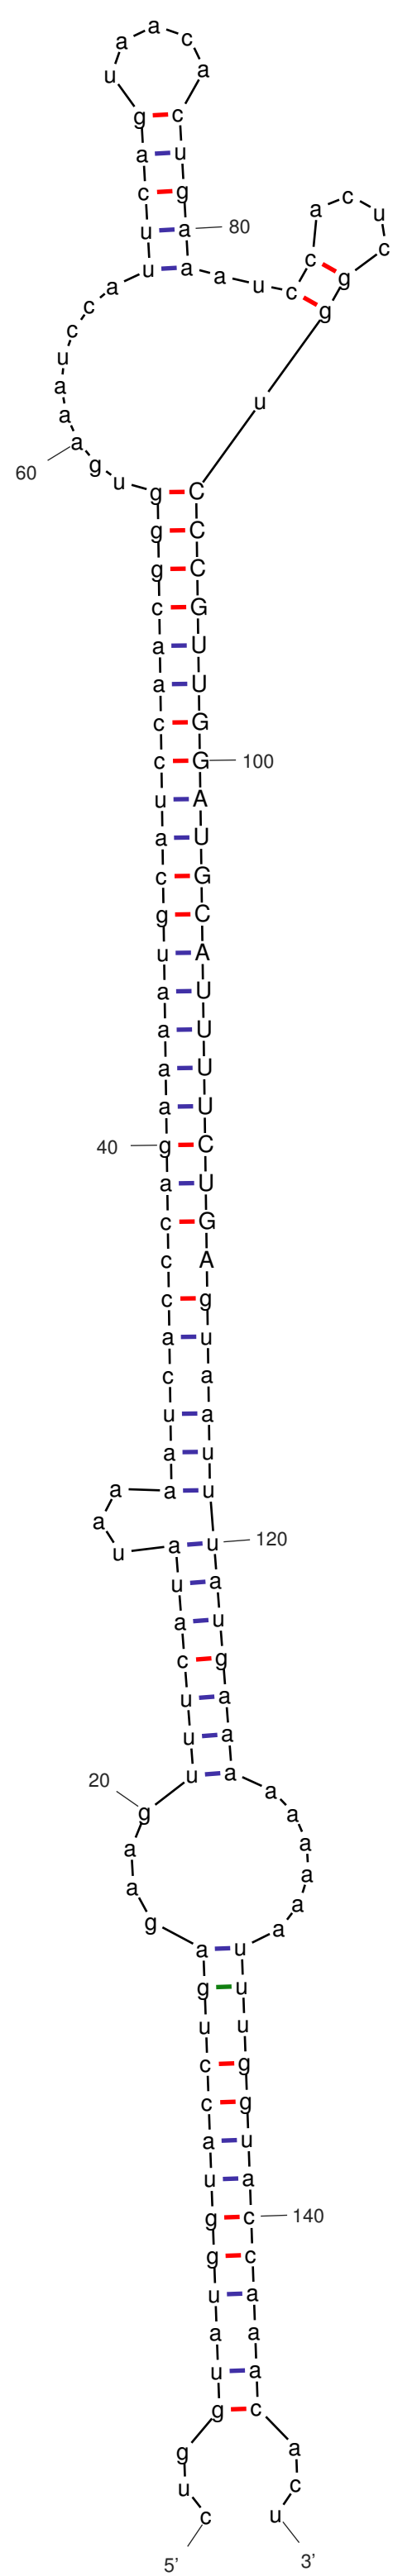

*dG = -56.34 [Initially -60.10] miR\_n11*

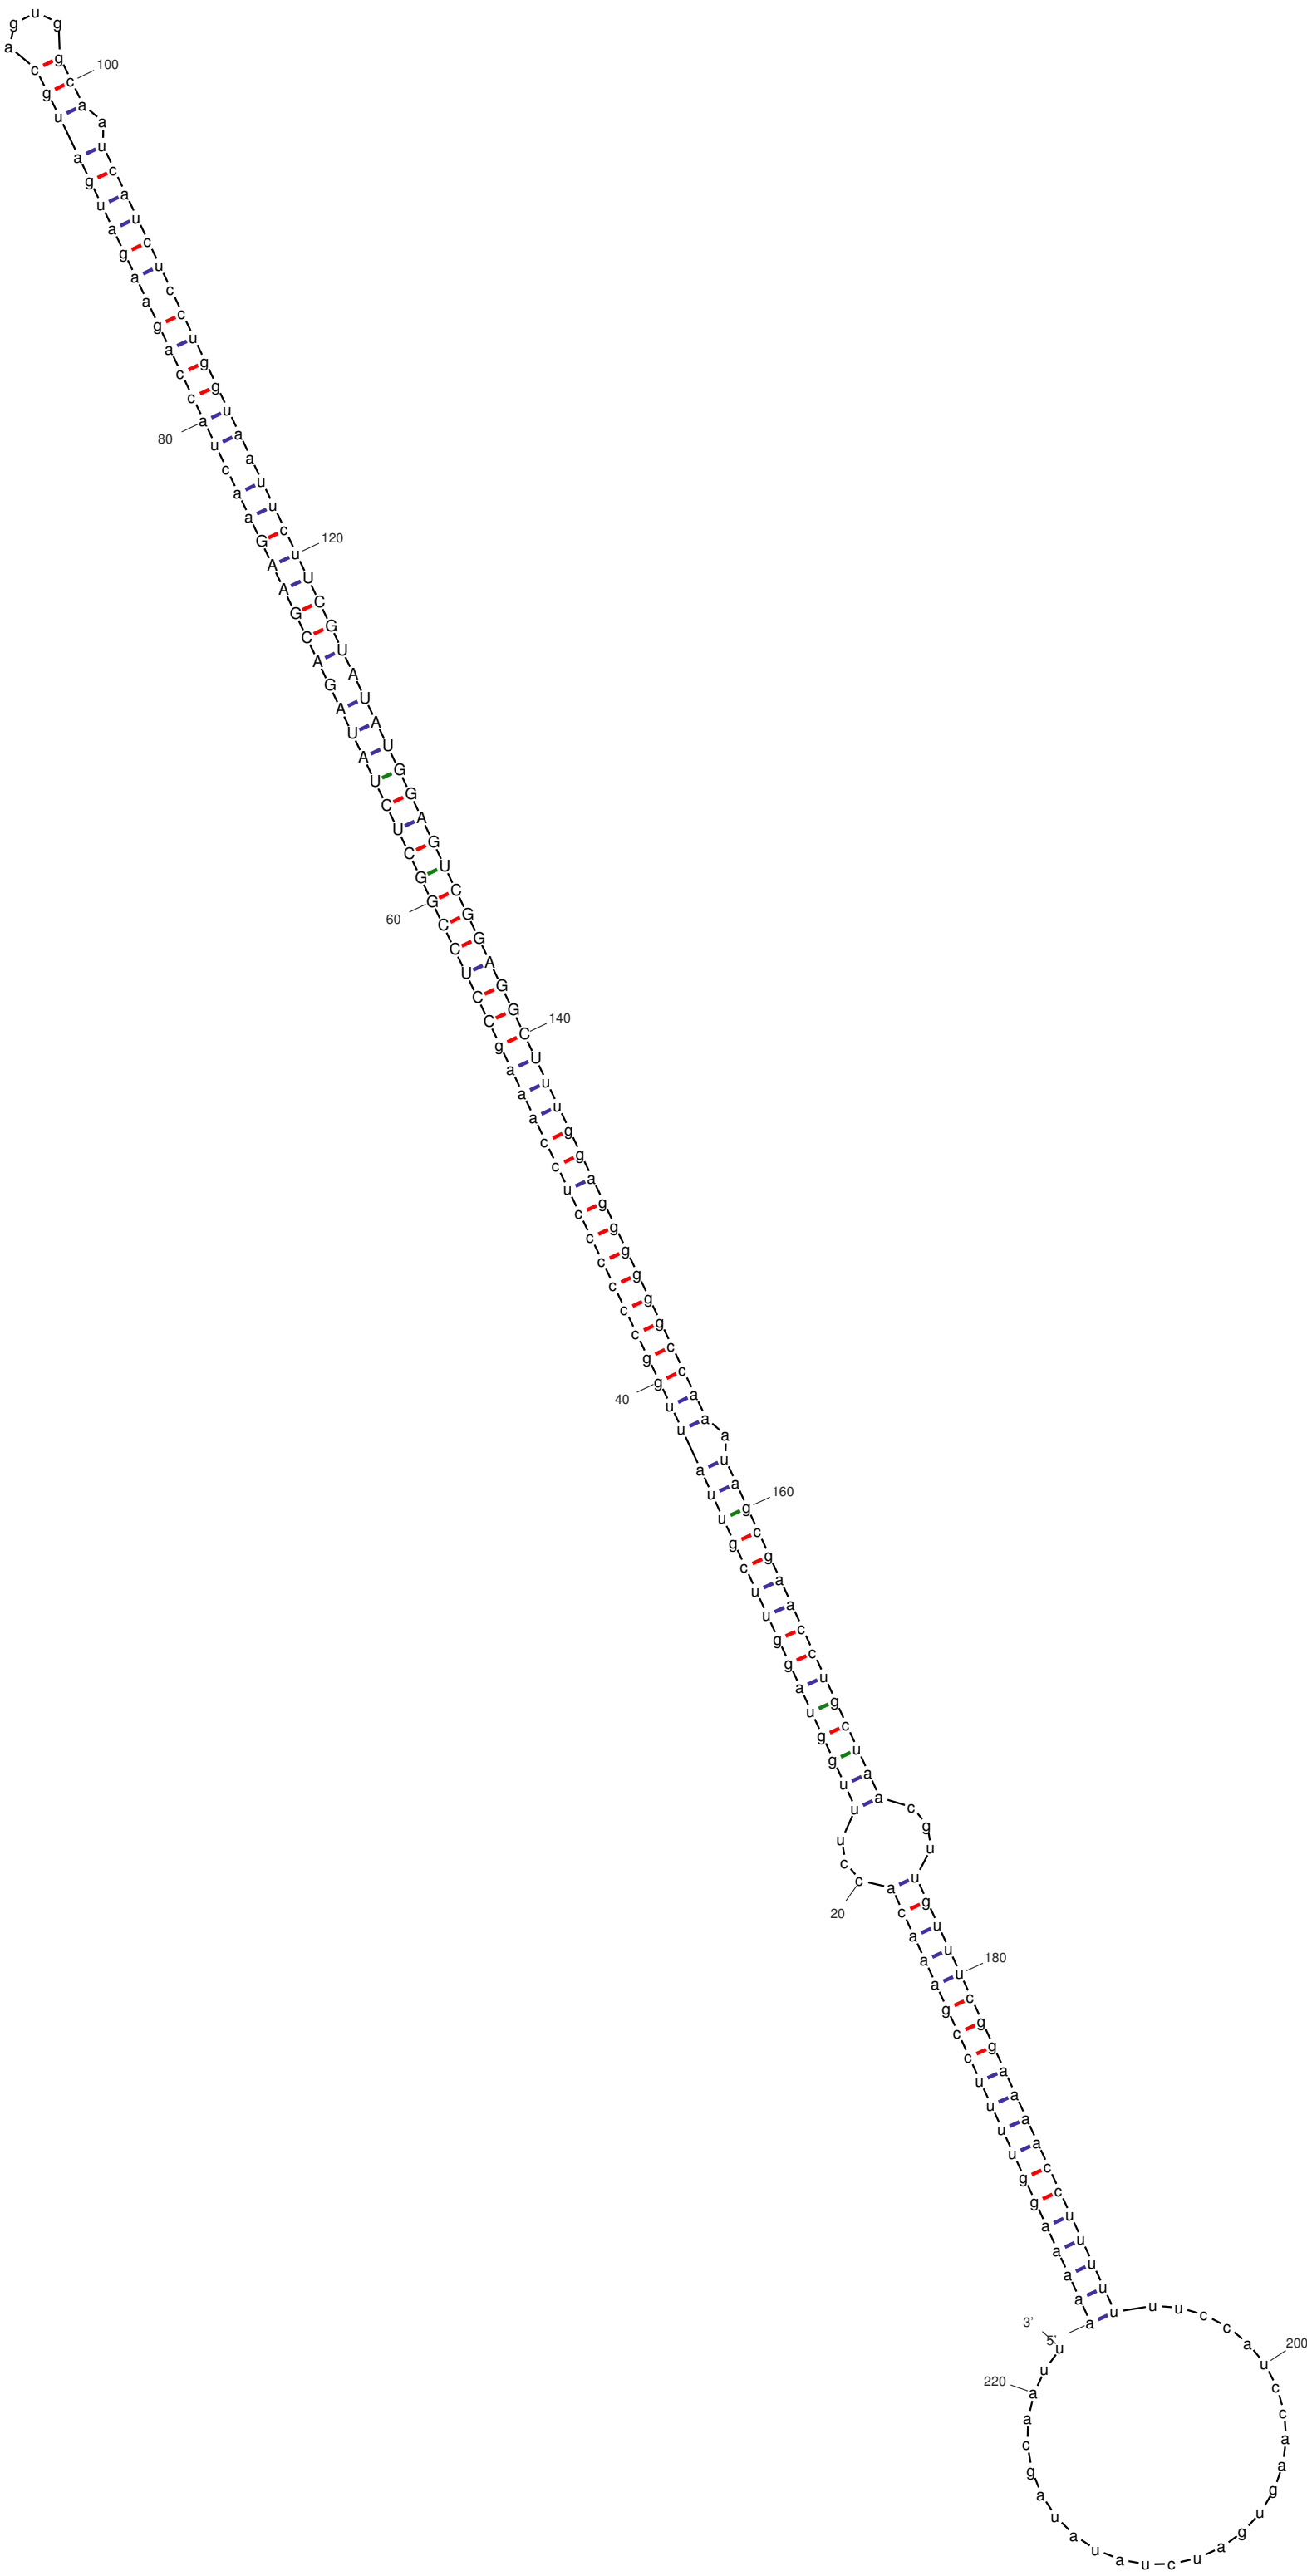

*dG = -148.60 [Initially -148.60] miR\_n12-3p*

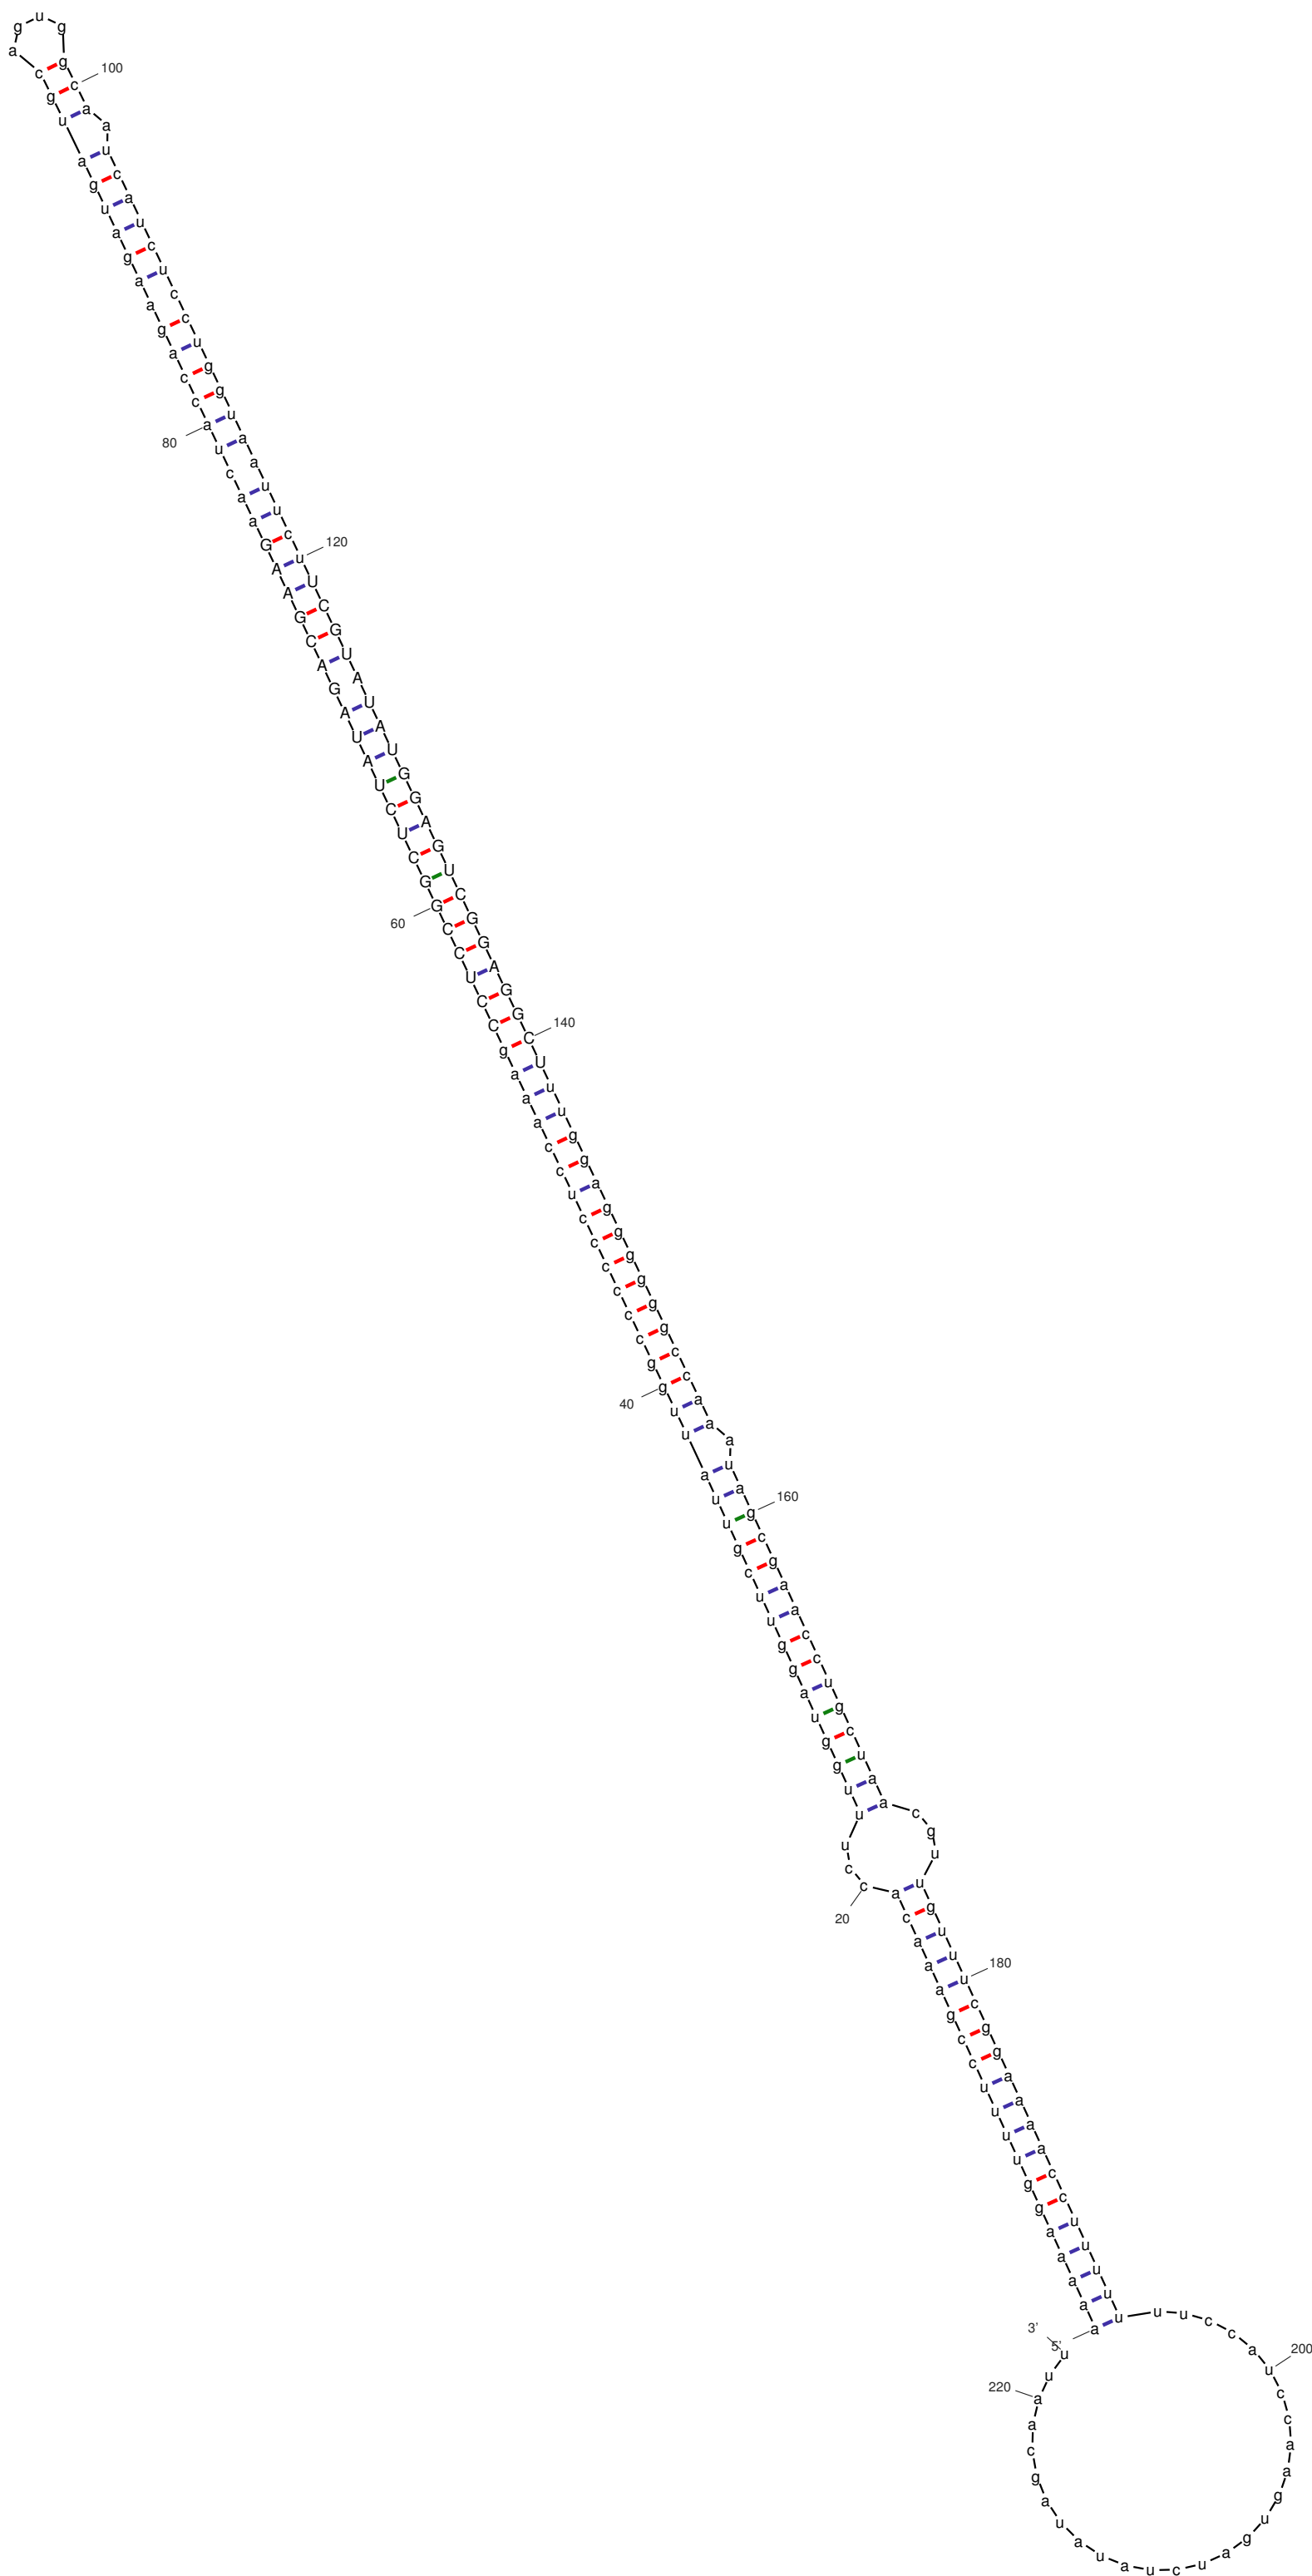

$dG = -148.60$  [Initially -148.60] miR\_n12-5p

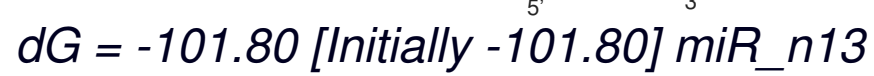

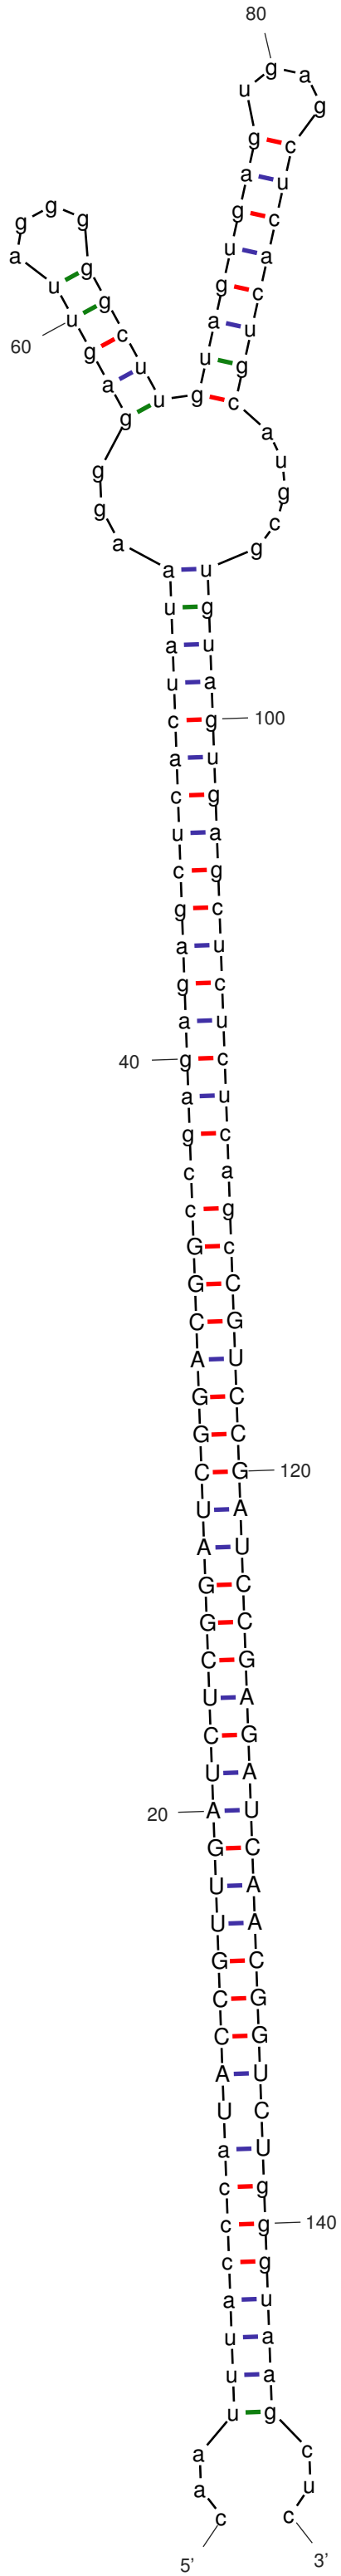

Supplement: s1 [file s1]
